# Supplementary material for: Application of fourier transform and proteochemometrics principles to protein engineering
Source: PubMed Central journal article supplement (PMC6191906; doi:10.1186/s12859-018-2407-8), 2018-10-16
Supplement: 12859_2018_2407_MOESM2_ESM.pdf [file 12859_2018_2407_MOESM2_ESM.pdf]

## Additional file 2

### Evaluation of the iSAR methodology on several datasets.

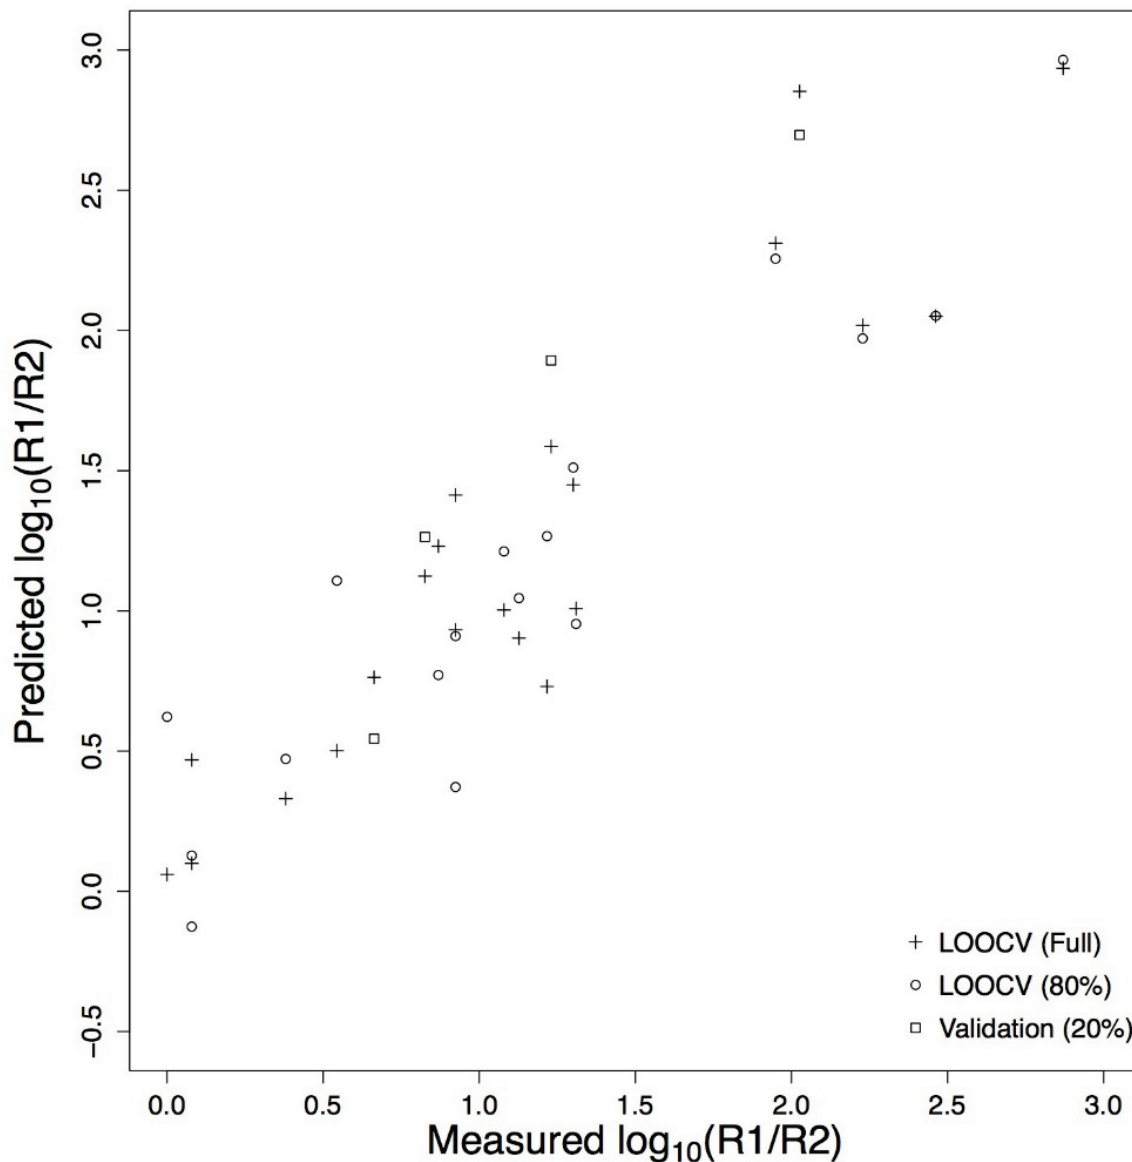

Figure S1. Plot of measured affinity of TNF variants versus predicted affinity using iSAR algorithm.

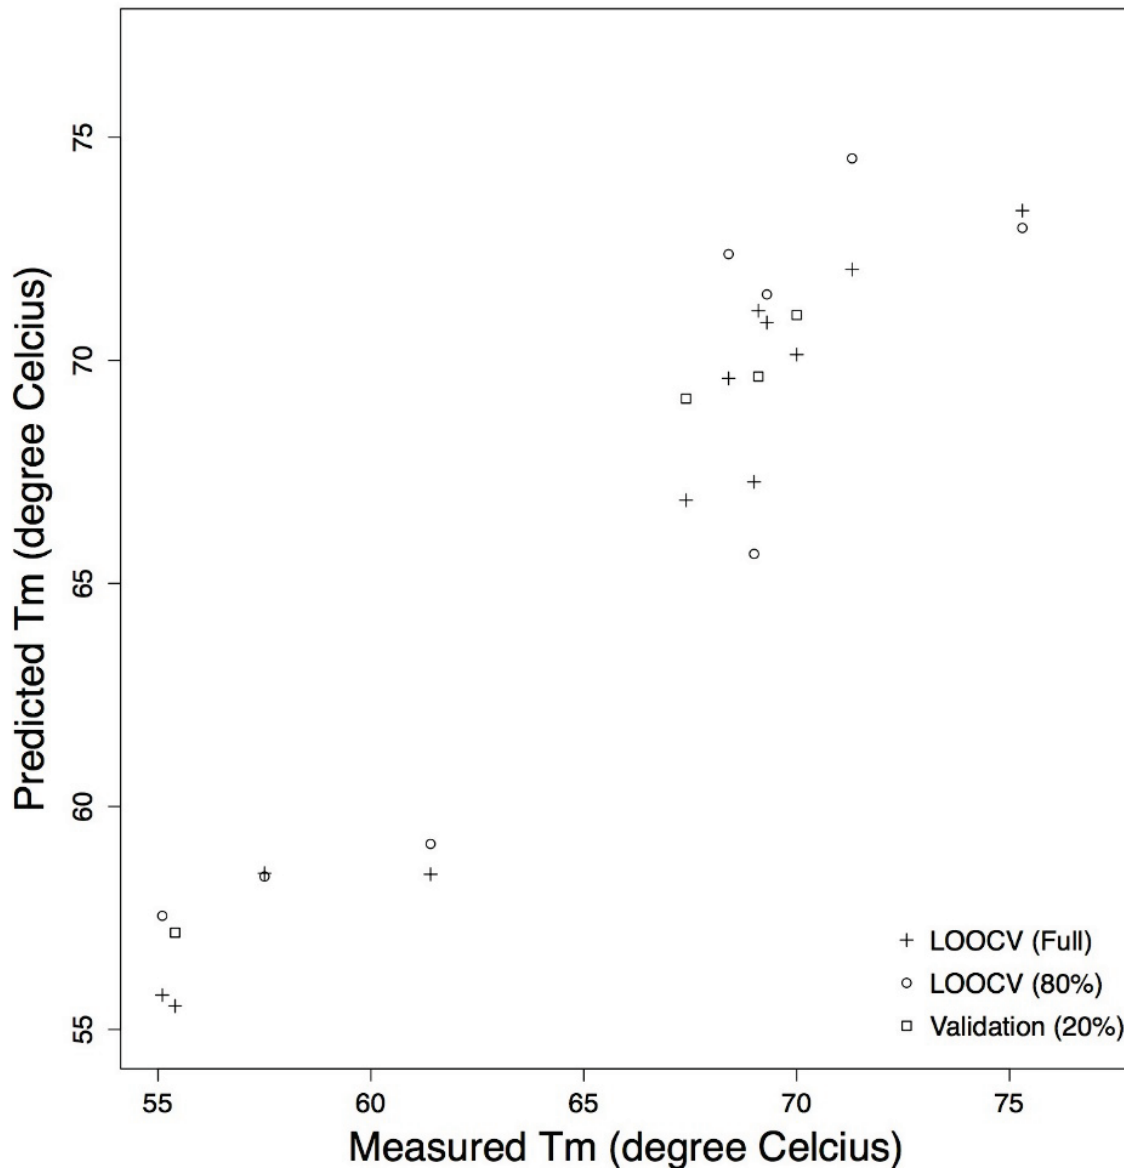

**Figure S2. Plot of measured thermostability of enterotoxin variants versus predicted thermostability using iSAR algorithm.**

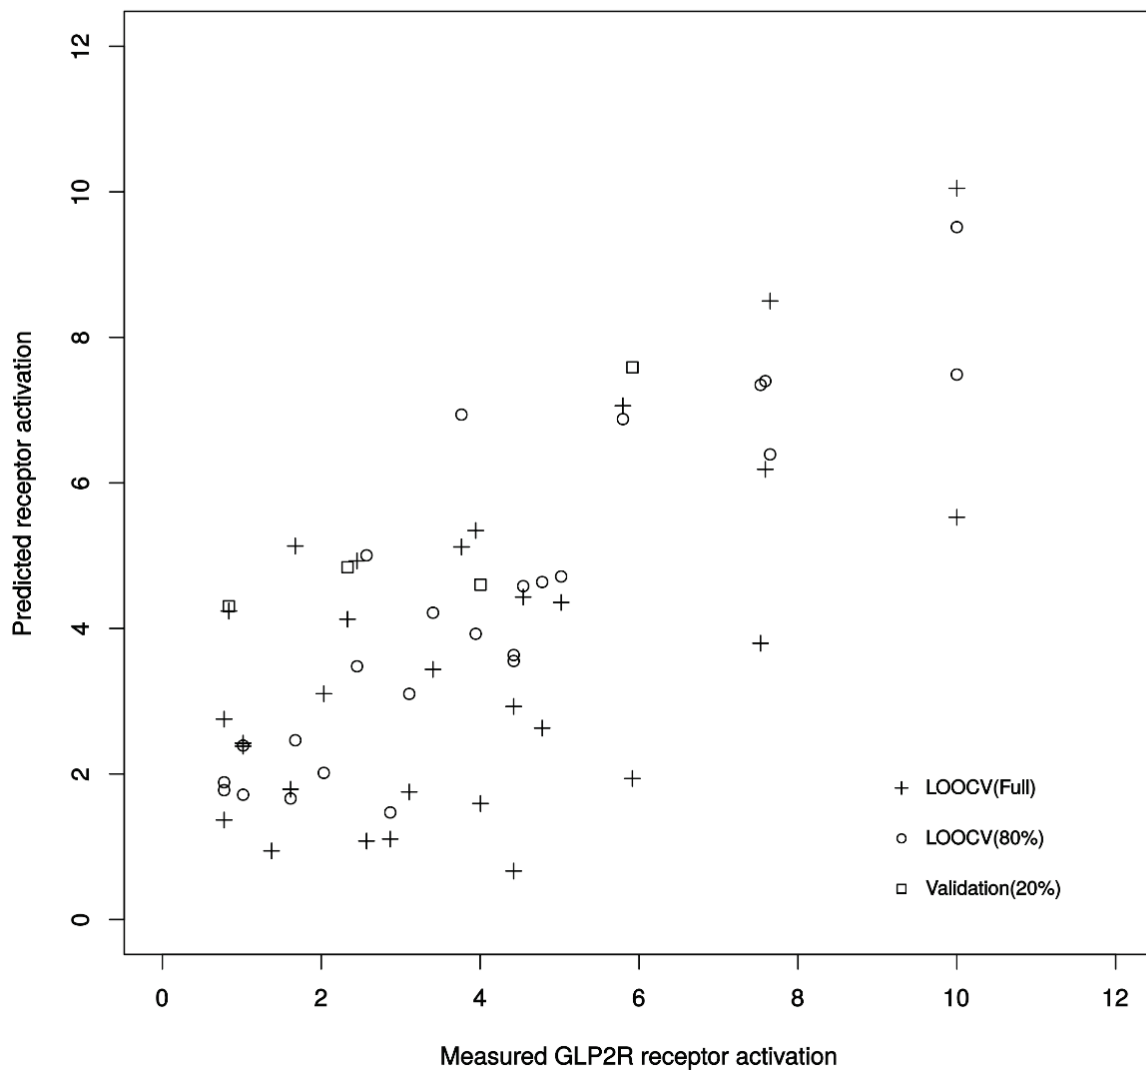

**Figure S3. Plot of measured GLP2R receptor activation of GLP2 variants versus predicted receptor activation using iSAR algorithm**
